# Supplementary material for: Cobalt ferrite–polyaniline heteroarchitecture: a magnetically recyclable photocatalyst with highly enhanced performances
Source: Royal Society of Chemistry journal article supplement (doi:10.1039/c2jm31522j), 2012-01-01
Supplement: c2jm31522j.pdf [file c2jm31522j.pdf]

## Supplementary Information

### Cobalt ferrite-polyaniline heteroarchitecture: A magnetically recyclable photocatalyst with highly enhanced performances

Pan Xiong<sup>a</sup> Qun Chen<sup>b</sup>, Mingyang He<sup>b</sup>, Xiaoqiang Sun<sup>\*b</sup> and Xin Wang<sup>\*a</sup>

<sup>a</sup> Key Laboratory for Soft Chemistry and Functional Materials of Ministry Education, Nanjing University of Science and Technology, Nanjing, China. Fax: +86-25-8431-5054; Tel: +86-25-84305667; E-mail: wxin@public1.ptt.js.cn (X. Wang)

<sup>b</sup> Key Laboratory of Fine Petrochemical Engineering, Changzhou university, Changzhou 213164, China

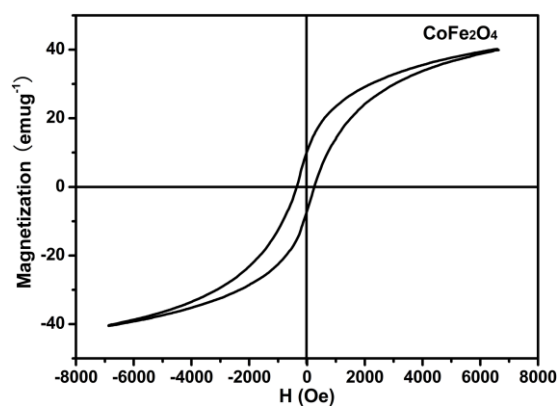

Fig. S1 Magnetic hysteresis loop of pure CoFe<sub>2</sub>O<sub>4</sub>.

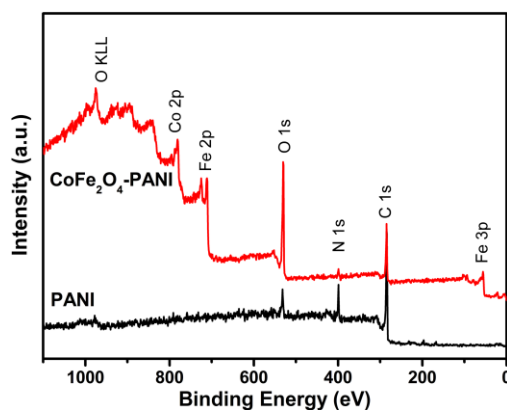

Fig. S2 The survey XPS spectra of PANI and CoFe<sub>2</sub>O<sub>4</sub>-PANI.

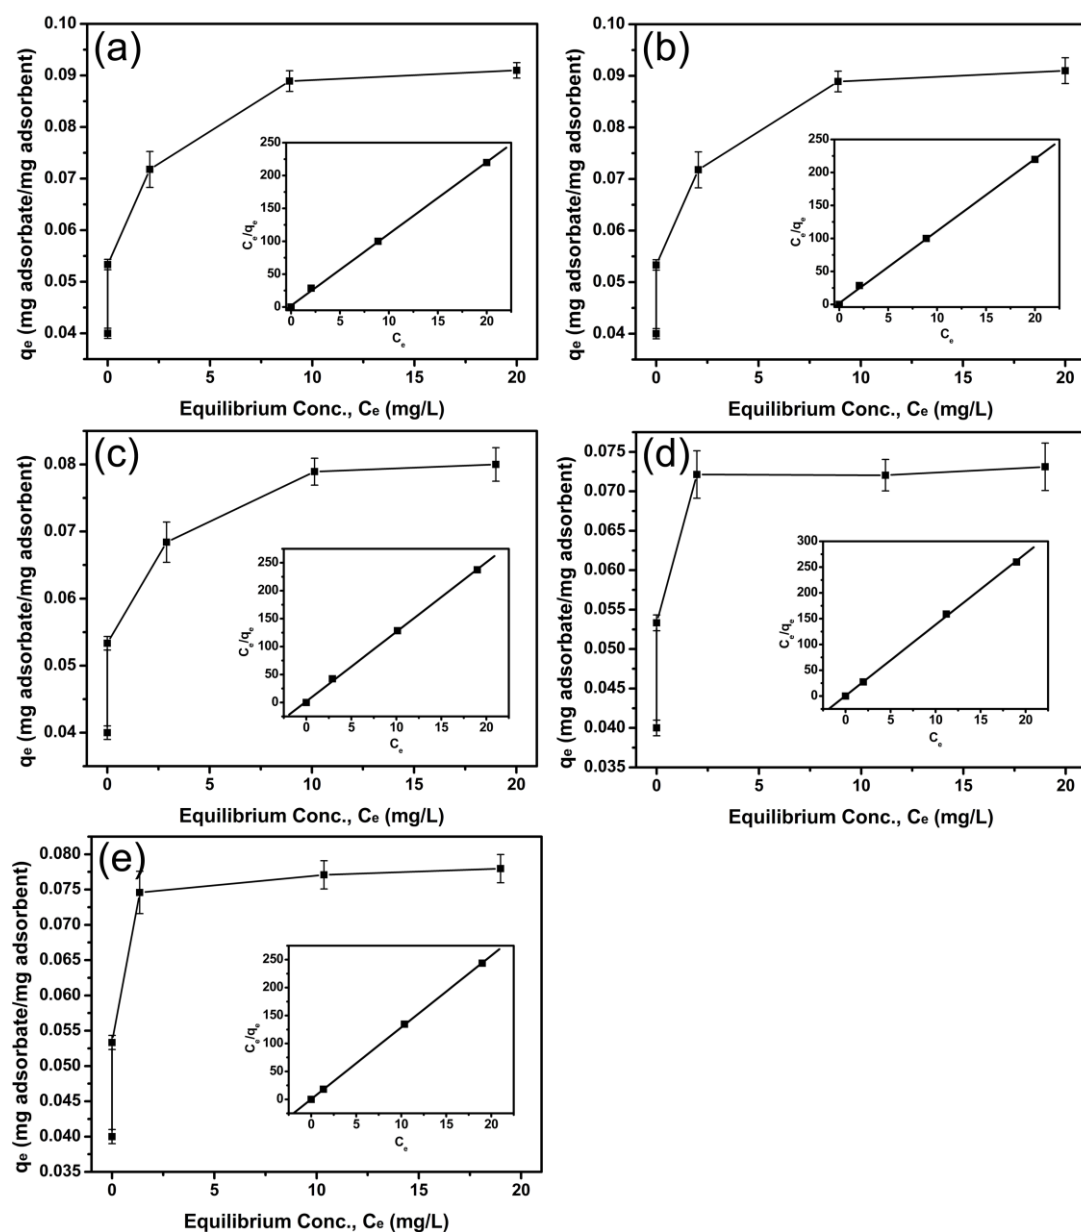

Fig. S3 The adsorption curves of dyes in the presence of CoFe<sub>2</sub>O<sub>4</sub>-PANI: (a) AB, (b) AY, (c) NY, (d) RB, (e) RY.

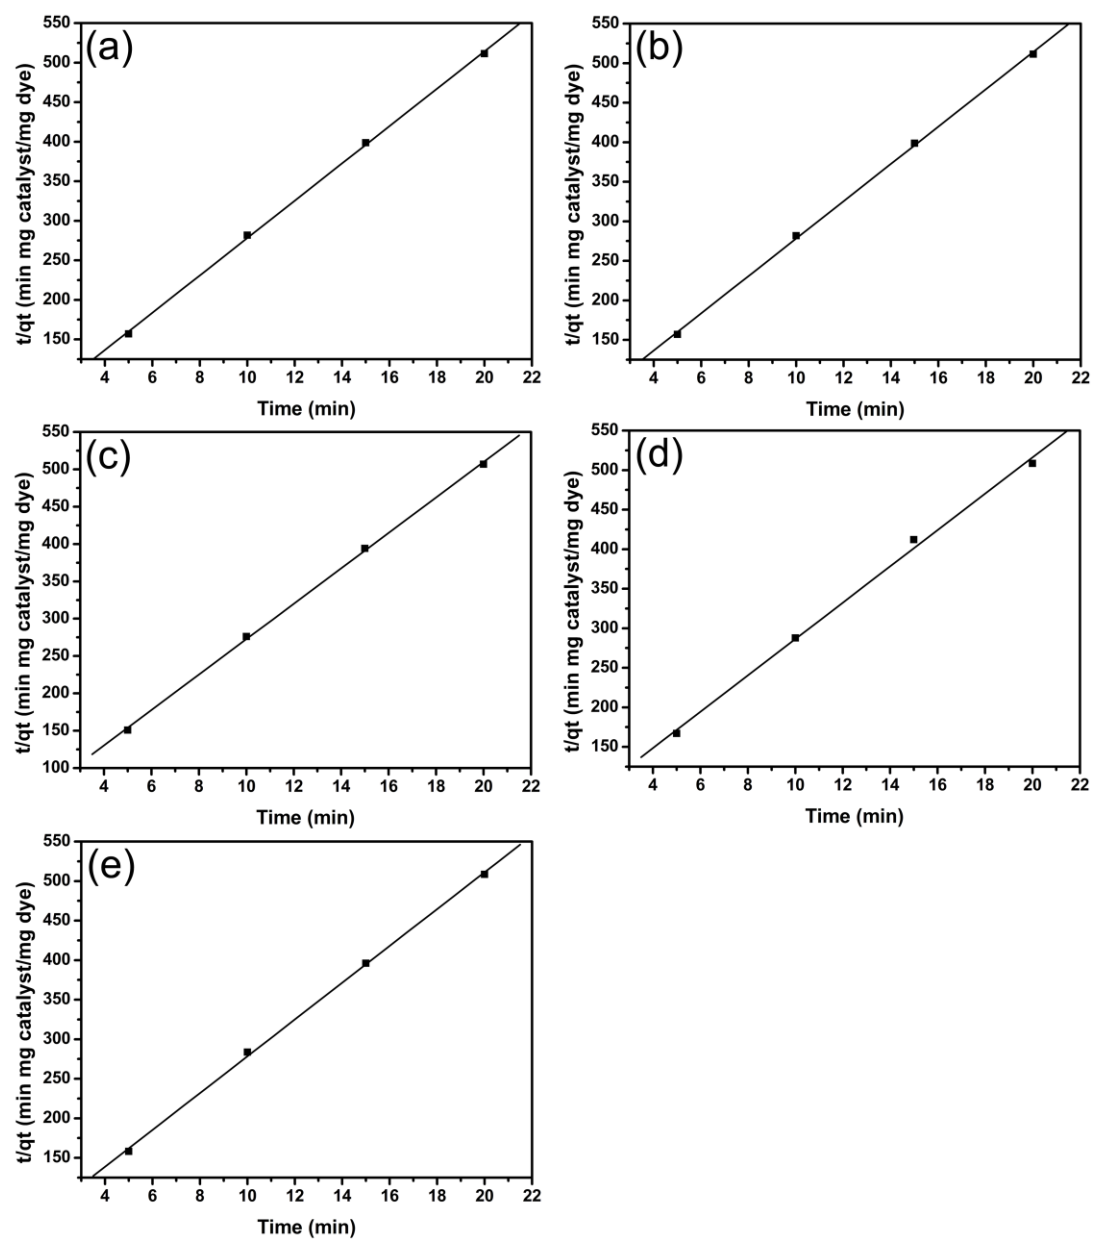

Fig. S4 The adsorption kinetic of dyes in the presence of CoFe<sub>2</sub>O<sub>4</sub>-PANI: (a) AB, (b) AY, (c) NY, (d) RB, (e) RY.

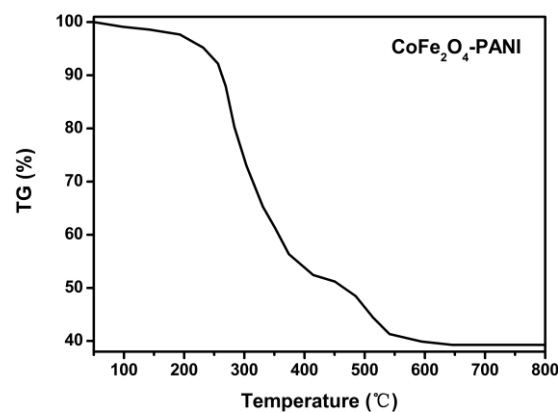

Fig. S5 The TG spectra of CoFe<sub>2</sub>O<sub>4</sub>-PANI.

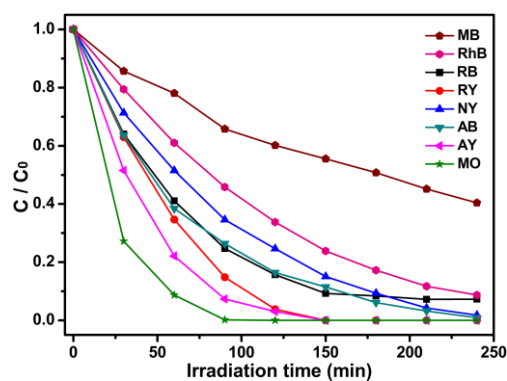

Fig. S6 The photodegradation of dyes under UV light irradiation.

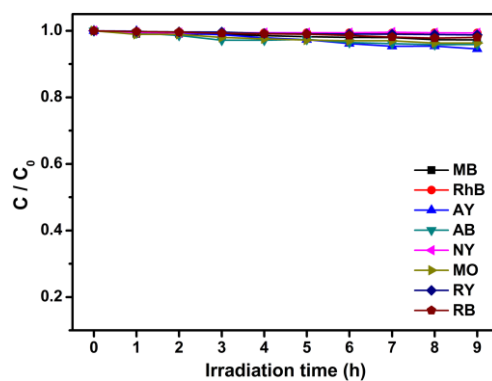

Fig. S7 The photodegradation of dyes in the absence of photocatalysts under visible light irradiation.

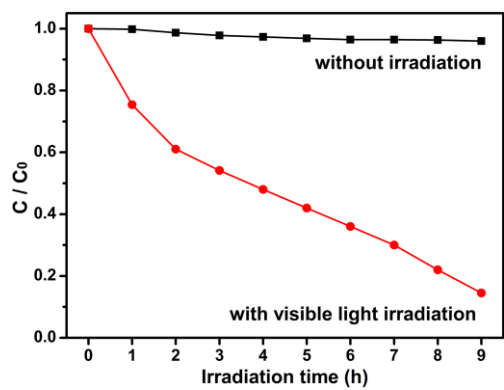

Fig. S8 The photodegradation of MO in the absence of  $\text{CoFe}_2\text{O}_4\text{-PANI}$  under visible light irradiation and without irradiation.
